# Supplementary material for: A Timeline of Biosynthetic Gene Cluster Discovery in Aspergillus fumigatus: From Characterization to Future Perspectives
Source: MDPI journal article supplement (doi:10.3390/jof10040266), 2024-04-02
Supplement: s1 [file s1]

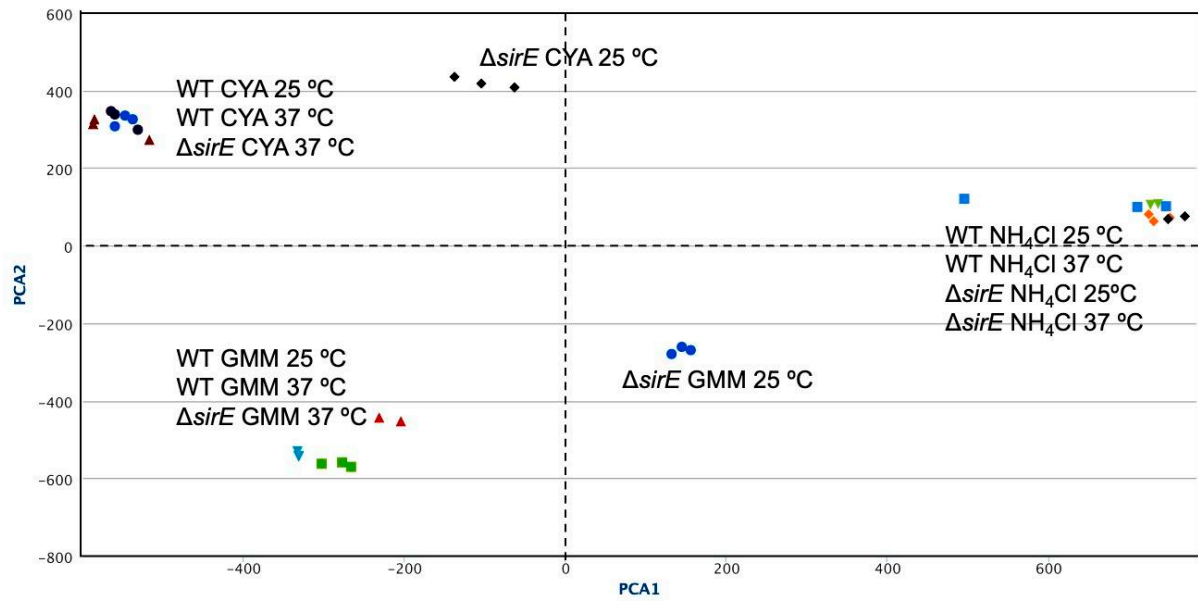

**Supplemental Figure S1. Distributions of SM features in *A. fumigatus* WT and  $\Delta sirE$  strains based on the principal component analysis.** Five main clusters were observed by which the  $\Delta sirE$  strain grown at 25 °C in both CYA and GMM were clustered individually and separately from the rest of the growth conditions.

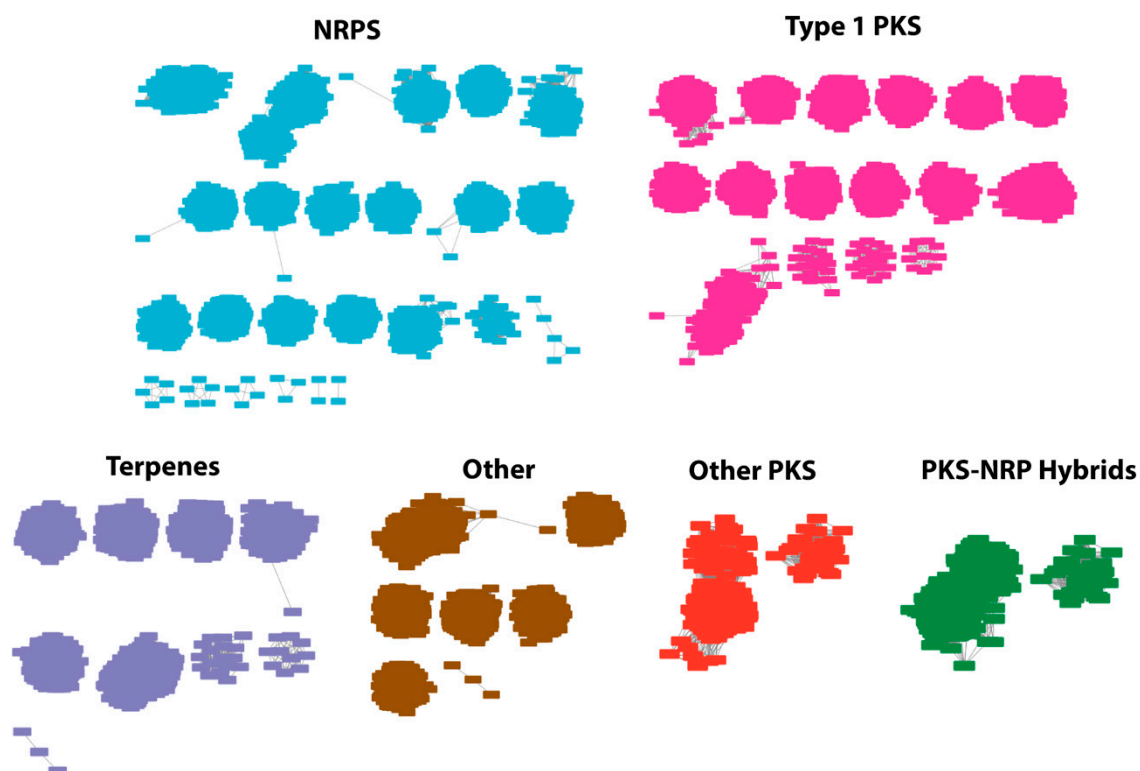

**Supplemental Figure S2. Network visualization of the secondary metabolome in the *Aspergillus fumigatus* species complex.** The classes are defined by the presence of core natural product synthases/synthetases within the detected biosynthetic gene cluster. Each class of secondary metabolites is colored and labeled accordingly.
